# Supplementary material
Source: PubMed Central journal article supplement (PMC11075457)
Supplement: iai.00006-24-s0001.pdf [file iai.00006-24-s0001.pdf]

# Supplemental Figure 1

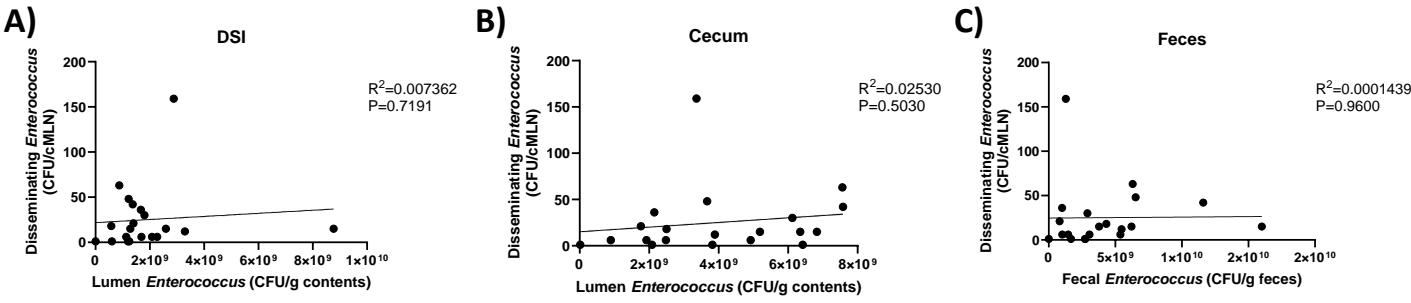

**S1** *E. faecalis* dissemination is not correlated with its abundance in the distal small intestine (DSI), cecum, or feces. (A-C) Mice were colonized as in **Fig. 1A**. *E. faecalis* dissemination was enumerated in the cMLN and correlated with its abundance in the DSI (A), cecum (B), and feces (C). Data is pooled from 4 independent experiments using 5 mice per group.  $R^2$  and P values were calculated using a Pearson correlation analysis.

# Supplemental Figure 2

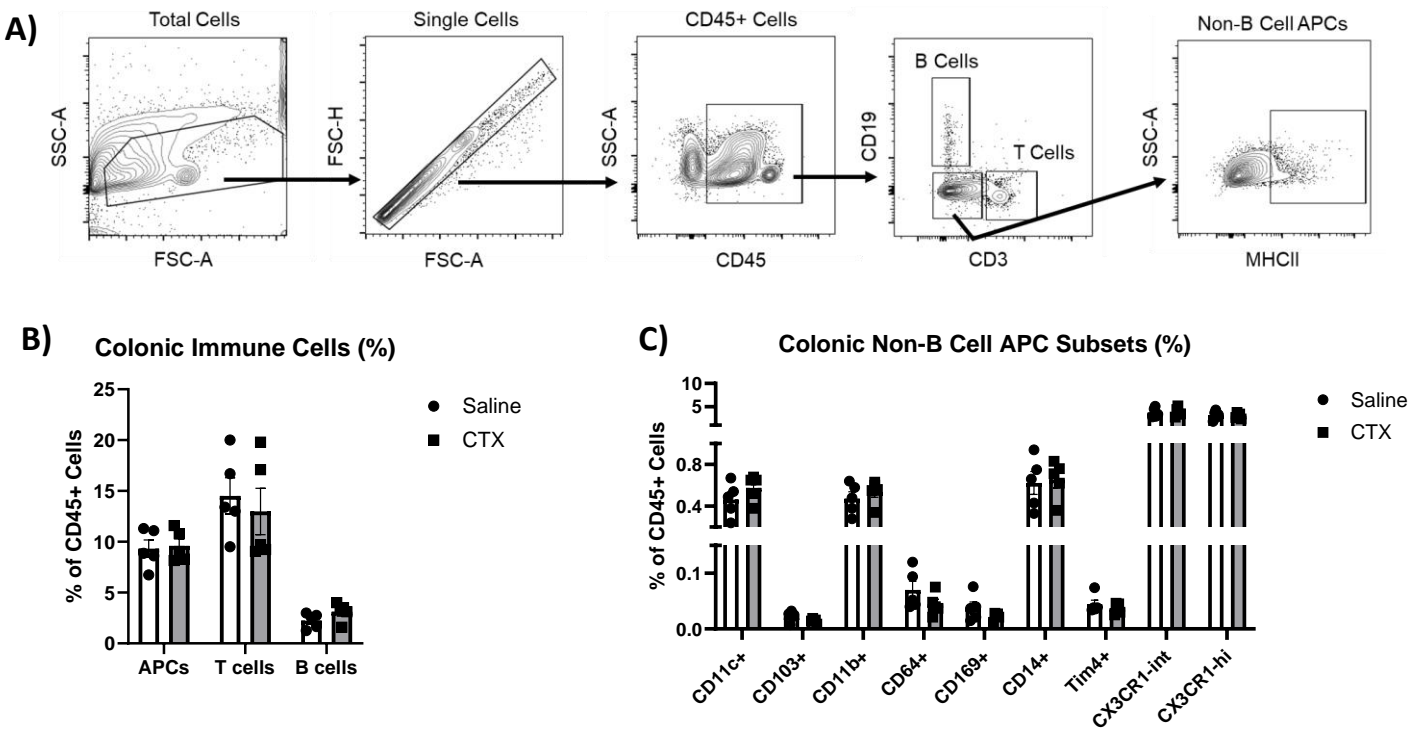

**S2** Ceftriaxone does not elicit gross immunological changes in the colonic lamina propria. (A) Representative gating strategy for identifying T cells (CD45+ CD3+ CD19-), B cells (CD45+ CD3- CD19+) and non-B cell APCs (CD45+ CD3- CD19- MHCII+) in the colon by flow cytometry. Colons were harvested from mice treated as in **Fig. 1A** and flow cytometry was performed to assess non-B cell APCs, T cells, and B cells (**B**), or non-B cell APC subsets (**C**) as a percentage of CD45+ cells. Mean and standard error of the mean are reported, and statistical significance was determined using an unpaired t test ( $P > 0.05$  not reported). Data is representative of 3 independent experiments using 5 mice per group.

# Supplemental Figure 3

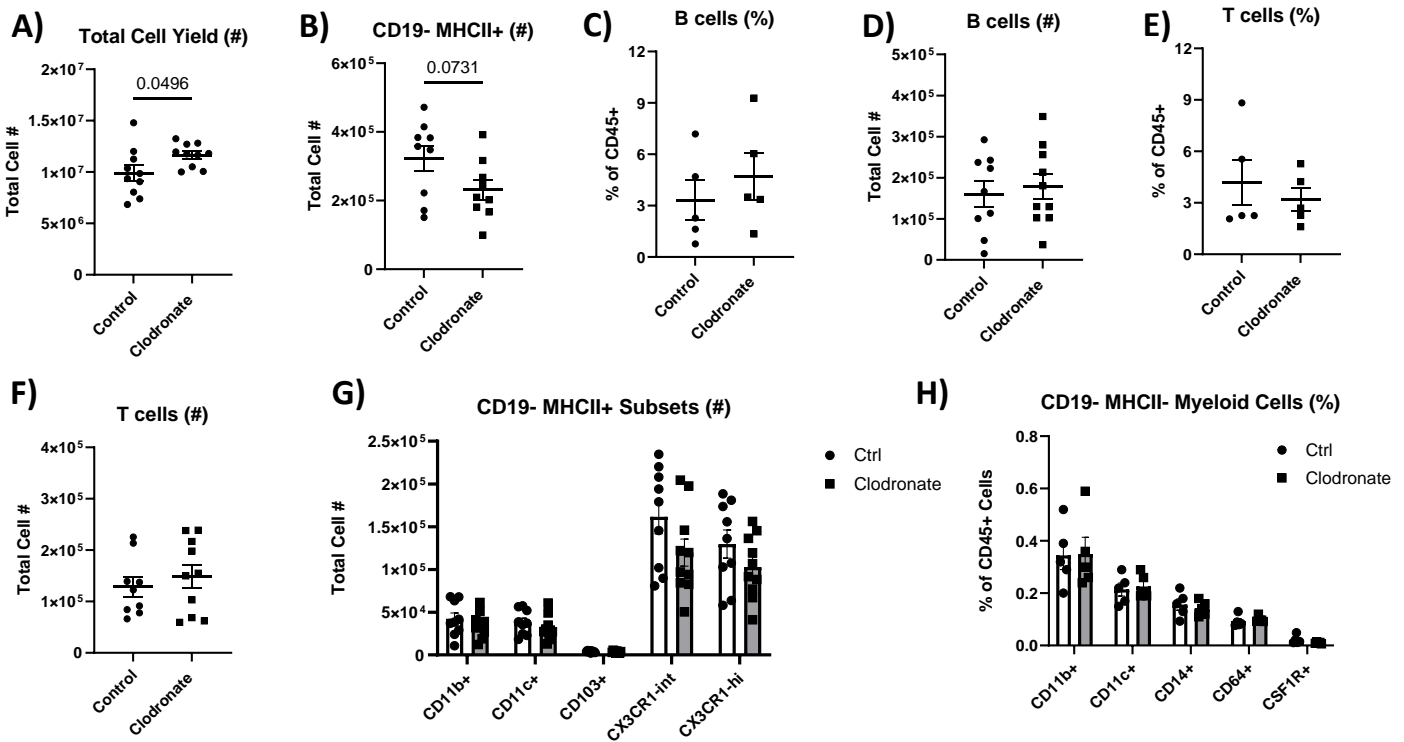

**S3** Effects of intracolonic clodronate administration on colonic immune cell populations. Mice were treated as in **Fig. 2A**. Total cell yields from colonic lamina propria isolation of control and clodronate treated mice (**A**). Flow cytometric analysis of colonic non-B cell APCs (CD45+ CD3- CD19- MHCII+) (**B**), B cells (CD45+ CD3- CD19+) (**C, D**), T cells (CD45+ CD3+ CD19-) (**E, F**), relevant APC subsets (**G**), or non-APC myeloid cell subsets (CD45+ CD3- CD19- MHCII-) (**H**). Y-axis represents the total cell number (**A, B, D-G**), or the percent of CD45+ cells (**C, E, H**) as a percent of CD45+ cells. Mean and standard error of the mean are reported, and statistical significance was determined using an unpaired t test. Data is representative of 3 independent experiments using 5 mice per group. (**C, E, H**) Data is pooled from 2 experiments to account for variability in cell yields. P > 0.10 not reported.
